# Supplementary material for: EUS-guided intrahepatic biliary drainage: a large retrospective series and subgroup comparison between percutaneous drainage in hilar stenoses or postsurgical anatomy
Source: PubMed Central journal article supplement — Endosc Int Open. 2020 Nov 17;8(12):E1782–94. doi: 10.1055/a-1264-7511 (PMC7671754; doi:10.1055/a-1264-7511), 2020-11-17
Supplement: 1980supmat_10-1055-a-1264-7511.pdf [file 1980supmat_10-1055-a-1264-7511.pdf]

## Supplementary material

### Appendix 1

For each case or control, the following variables were extracted:

1) demographical variables; 2) primary disease and indication (i.e. malignant vs. benign; level of the stenosis; eventual previous failed ERCP; eventual disconnected left/right hepatic ducts); 3) technical aspects (ie, stent type, length and diameter; procedure duration); 4) biochemical variables (total bilirubin before procedure, at day 7 and at nadir (with time-to-nadir); absolute and relative reduction); 5) adverse events; 6) outcomes (i.a. post-procedure hospital stay; time-to-chemotherapy initiation/resumption, dysfunction, eventual time-to-dysfunction and rescue procedures; post-procedural reinterventions; deaths and causes of death). For EUS-IBD additional variables were evaluated: ascites or liver metastasis at the moment of the procedure; calibre and type of needle used to puncture the biliary tree; pre- and post-procedural C-reactive protein (CRP).

### Appendix 2

See **Fig. 2**. We categorized the procedures following EUS-guided intrahepatic access as: 1) EUS-guided rendez-vous (e-RV) when EUS-IBD was used to allow antegrade trans-papillary placement of a guidewire, which was subsequently used for final retrograde cannulation; 2) EUS-guided antegrade stenting (e-AS) when a guidewire was advanced through the stenosis and subsequently a conventional self-expandable metal stent (SEMS) was advanced trans-gastric and trans-hepatic over the guidewire to cross the stenosis; 3) EUS-guided hepatico-gastrostomies (e-HG) when the drainage was guaranteed through the placement of a SEMS between the left intrahepatic duct and the stomach (see **Fig. 3**). For e-HGs either specifically-designed stents or conventional stents were used as addressed in the Definition section of the manuscript.

In the PTBD group we categorized the procedures as: 1) percutaneous antegrade stenting (p-AS) when a metal stent was advanced trans-hepatic and finally placed bypassing a stenosis; 2) percutaneous external/internal drainage (p-EID) for a trans-cutaneous, trans-hepatic, trans-papillary catheter; 3) percutaneous external drainage (p-ED) when the stenosis could not be passed and drainage was obtained through a trans-hepatic externally-placed catheter connected to a drainage bag.

### Appendix 3

Clinical success was defined as: 1) the successful management of choledocholithiasis (clinical diagnosis); 2) a lowering bilirubin  $\geq 25\%$  in case of

## Supplementary material

stenosis with elevated bilirubin (laboratory diagnosis); 3) the achievement of a desired clinical result (e.g. successful internalization of a PTBD drainage, removal of an inward migrated stent, a clinical resolution of symptoms / clinically significant reduction in inflammatory markers or cholestatic set) in case of no bilirubin elevation or unavailable serial measurement (clinical diagnosis).

## Supplementary material

**Table S1** Laboratory evaluation among technically successful procedures.

| Variable                                              | Total N = 87                                                                                                                                                                       |
|-------------------------------------------------------|------------------------------------------------------------------------------------------------------------------------------------------------------------------------------------|
| Cholestasis                                           |                                                                                                                                                                                    |
| Available biochemical serial measurement, n           | 66                                                                                                                                                                                 |
| Pre-procedural elevation of bilirubin, n (%)          | 63 (95.5%)                                                                                                                                                                         |
| Median pre-procedural bilirubin [IQR], mg/dl          | 7 mg/dL [3.5-13.8]                                                                                                                                                                 |
| Any post-procedural reduction of bilirubin, n (%)     | 61/63 (96.8%)                                                                                                                                                                      |
| <b>Reduction &gt; 25% of bilirubin, n (%)</b>         | <b>57/63 (90.5%)</b>                                                                                                                                                               |
| <b>Reduction &gt; 50% of bilirubin, n (%)</b>         | <b>44/63 (69.8%)</b>                                                                                                                                                               |
| Median bilirubin reduction (C.I.), mg/dL <sup>†</sup> | -4.8 mg/dl (95%CI -6.3 to -3.4) <sup>†</sup>                                                                                                                                       |
| Median relative reduction [IQR]                       | 64% [42.2-78]                                                                                                                                                                      |
| Median time to nadir bilirubin [IQR], days            | 7 [5-13]                                                                                                                                                                           |
| Inflammation                                          |                                                                                                                                                                                    |
| Available biochemical data, n                         | 66                                                                                                                                                                                 |
| Pre-procedural elevation of CRP, n (%)                | 62 (93.9%)                                                                                                                                                                         |
| <b>Acute post-procedural increase of CRP, n (%)</b>   | <b>48/63 (76.2%)</b>                                                                                                                                                               |
| According to adverse events status                    |                                                                                                                                                                                    |
| Patients without any clinical correlate, n (%)        | 22/34 ( <b>64.7%</b> ) <sup>§</sup><br>Median increase at day 1 = +33.8 mg/dL ( $P = 0.0001$ ) <sup>‡</sup><br>Median increase at day 7 = N.S. <sup>4</sup>                        |
| Patients with mild post-procedural pain, n (%)        | 12/14 ( <b>85.7%</b> ) <sup>§</sup><br>Median increase at day 1 = +37.5 mg/dL ( $P = 0.0093$ ) <sup>‡</sup><br>Median increase at day 7 = N.S. <sup>4</sup>                        |
| Patients with adverse events, n (%)                   | 14/15 ( <b>93.3%</b> ) <sup>‡</sup><br>Median increase at day 1 = +31.2 mg/dL ( $P = 0.004$ ) <sup>‡</sup><br>Median increase at day 7 = +55.6 mg/dL ( $P = 0.0085$ ) <sup>‡</sup> |
| Radiological evaluations                              |                                                                                                                                                                                    |
| Available clinical follow-up, n                       | 77                                                                                                                                                                                 |
| Post-procedural radiology, n (%)                      | 16 (20.8%)                                                                                                                                                                         |
| Asymptomatic patients,                                | 7/16 (43.8%)                                                                                                                                                                       |

## Supplementary material

|                                      |              |
|--------------------------------------|--------------|
| n (%)                                |              |
| Findings, n (%)                      |              |
| Negative                             | 5/16 (31.3%) |
| Free subdiaphragmatic air            | 2/16 (12.5%) |
| Pleuro-pulmonary involvement         | 9/16 (56.3%) |
| New or increase pleural effusion     | 6            |
| Basal hypoventilation                | 5            |
| Free fluid in Douglas Hemoperitoneum | 1/16         |
|                                      | 1/16         |

---

IQR, interquartile range; CRP, C-reactive protein; NS, not significant

\*Among patients with biliary stenosis (excluding choleodocolithiasis)

†Hodges-Lehmann median bilirubin reduction comparing pre-procedural and nadir bilirubin (Wilcoxon test,  $P < 0.0001$ ).

§ $\chi$ -squared test for proportions of elevation  $P = 0.0607$ ,  $\chi$ -squared test for trend  $P = 0.0208$ .

‡Hodges-Lehmann median difference between pre-procedural CRP and CRP at day 1 or 7 at Wilcoxon test.

## Supplementary material

**Table S2** Technical aspects among hepatico-gastrostomies.

| <b>Hepatico-gastrostomies</b>                          |                                | <b>N=43</b>                |                |
|--------------------------------------------------------|--------------------------------|----------------------------|----------------|
| Technical success, n (%)                               |                                | 38 (88.4%)                 |                |
| Procedural length [IQR], minutes                       |                                | 34 [24-52]                 |                |
| Type of stent, n (%)                                   |                                |                            |                |
| FC-SEMS                                                |                                | 13<br>(34.2%)              |                |
| UC-SEMS                                                |                                | 1 (2.2%)                   |                |
| PC-SEMS                                                |                                | 1 (2.2%)                   |                |
| Overlapping UC (intrahepatic) + FC (transgastric)-SEMS |                                | 7 (15.6%)                  |                |
| HC-SEMS (Giobor)                                       |                                | 16<br>(37.7%)              |                |
| Diameter 8 mm                                          |                                | 4                          |                |
| Diameter 10 mm                                         |                                | 12                         |                |
| Variable                                               | Purpose-specific stents (N=16) | Previous approaches (N=22) | P value        |
| Clinical success, n (%)                                | 15/16 (93.7%)                  | 21/22 (95.5%)              | 0.82           |
| <b>Procedural length [IQR], minutes</b>                | <b>25 [19-31.8]</b>            | <b>48 [32-64]</b>          | <b>0.004 *</b> |
| Bilirubin reduction $\geq$ 25%, n (%) <sup>†</sup>     | 12/13 (92.3%)                  | 15/18 (83.3%)              | 0.45           |
| Bilirubin reduction $\geq$ 50%, n (%) <sup>†</sup>     | 8/13 (61.5%)                   | 8/18 (44.4%)               | 0.36           |
| Adverse events, n (%)                                  | 4/17 (23.5%)                   | 7/22 (31.8%)               | 0.71           |
| <b>Stent dysfunction, n (%)</b>                        | <b>1/15 (6.7%)</b>             | <b>6/20 (30%)</b>          | <b>0.09</b>    |

\* Statistically significant

<sup>†</sup> Among patients with pre-procedural bilirubin elevation

## Supplementary material

Table S3 Failures/adverse events/dysfunctions among hepatico-gastrostomies.

| Age                | Year | Primary Disease    | Level of stenosis | ASCites | Metastasis | Reasons for a transgastric approach                    | Isolated bile ducts | Stent model          | Stent diameter | Stent length | PP Hospital stay | Death | Survival | Comment                                                                         |
|--------------------|------|--------------------|-------------------|---------|------------|--------------------------------------------------------|---------------------|----------------------|----------------|--------------|------------------|-------|----------|---------------------------------------------------------------------------------|
| Technical failures |      |                    |                   |         |            |                                                        |                     |                      |                |              |                  |       |          |                                                                                 |
| 74                 | 2018 | Pancreatic cancer  | Distal            | 0       | 0          | Papillary inaccessible for tumor/stenosis/inflammation | N                   |                      |                |              | 4                | 0     | 439      | Opacification and biliary cannulation, but scope issue impeding stent placement |
| 78                 | 2018 | Cholangiocarcinoma | Hilar             | 0       | 0          | Failed ERCP cannulation                                | Y                   |                      |                |              | 9                | 0     | 399      | Opacification and biliary cannulation, but not enough space for stent placement |
| 87                 | 2019 | Pancreatic cancer  | Distal            | 0       | 0          | Failed ERCP cannulation                                | N                   |                      |                |              | 4                | 1     | 82       | GW dislocation                                                                  |
| 71                 | 2019 | Cholangiocarcinoma | Hilar             | NA      | NA         | Failed ERCP cannulation                                | Y                   | HC Giobor / Taewoong | NA             | NA           | 12               | 0     | 146      | Extragastri c-stent opening + bile leak > surgery                               |
| 67                 | 2019 | Benign stricture   | Anastomotic       | 0       | 0          | Surgery impeding access to papillary region            | Y                   |                      |                |              | 9                | 0     | 36       | Inability to puncture BD                                                        |

## Supplementary material

|                                                |      |                                        |             |   |   |   |                                      |    |     |    |   |     |                                                                   |
|------------------------------------------------|------|----------------------------------------|-------------|---|---|---|--------------------------------------|----|-----|----|---|-----|-------------------------------------------------------------------|
| 82                                             | 2018 | Clinical failures<br>Pancreatic cancer | Distal      | 0 | 0 | 1 | FC Wallflex / Boston Scientific      | 10 | 80  | 16 | 1 | 2   | Non-lowering bilirubin + fatal adverse event, see                 |
| 74                                             | 2019 | Cholangiocarcinoma                     | Anastomotic | 1 | 1 | 1 | HC Giobor / Taewoo                   | 8  | 80  | 16 | 1 | 16  | Non-lowering bilirubin                                            |
| Adverse events [excluding mild abdominal pain] |      |                                        |             |   |   |   |                                      |    |     |    |   |     |                                                                   |
| 66                                             | 2014 | Cholangiocarcinoma                     | Hilar       | 1 | 1 | 1 | FC Niti-S / Taewoo                   | 10 | 100 | 10 | 1 | 11  | Cholangitis, PP day 3                                             |
| 89                                             | 2016 | Ampulloma                              | Distal      | 0 | 1 | 0 | HC Giobor / Taewoo                   | 10 | 80  | 10 | 1 | 21  | Severe abdominal pain, SDPP, requiring additional hospitalization |
| 45                                             | 2017 | Pancreatic cancer                      | Distal      | 0 | 1 | 0 | FC Wallflex / Boston Scientific      | 10 | 80  | 17 | 1 | 379 | Cholangitis, PP day 4                                             |
| 59                                             | 2017 | Cholangiocarcinoma                     | Hilar       | 0 | 0 | 0 | UC + FC Wallflex / Boston Scientific | 10 | 60  | 10 | 1 | 273 | Bacteremia, SDPP                                                  |

## Supplementary material

|    |      |                    |             |    |    |                                                               |   |                                      |    |    |   |   |     |                                                                                                                                                                                                                              |
|----|------|--------------------|-------------|----|----|---------------------------------------------------------------|---|--------------------------------------|----|----|---|---|-----|------------------------------------------------------------------------------------------------------------------------------------------------------------------------------------------------------------------------------|
| 76 | 2018 | Cholangiocarcinoma | Anastomotic | 0  | 1  | Surgery impeding access to papillary region                   | 1 | UC + FC Wallflex / Boston Scientific | 10 | 60 | 1 | 1 | 138 | Cholangitis, PP day 1                                                                                                                                                                                                        |
| 82 | 2018 | Pancreatic cancer  | Distal      | 0  | 0  | Papillary region inaccessible for tumor/stenosis/inflammation | 0 | FC Wallflex / Boston Scientific      | 10 | 80 | 1 | 2 | 2   | Severe bleeding PP day 1, CT suspecting origin near the HG tract. Duodenal perforation during a previous procedure, which is likely to have played a major role in the outcome. Bile leak peritonitis managed conservatively |
| 57 | 2018 | Pancreatic cancer  | Distal      | NA | NA | Papillary region inaccessible for tumor/stenosis/inflammation | 0 | FC Wallflex / Boston Scientific      | 10 | 80 | 4 | 1 | 136 |                                                                                                                                                                                                                              |



## Supplementary material

|                   |      |                    |             |   |   |   |   |                                             |                                 |    |     |    |   |     |                                                                                                |
|-------------------|------|--------------------|-------------|---|---|---|---|---------------------------------------------|---------------------------------|----|-----|----|---|-----|------------------------------------------------------------------------------------------------|
| 78                | 2018 | Cholangiocarcinoma | Hilar       | 0 | 0 | 0 | 1 | Surgery impeding access to papillary region | PC Wallflex / Boston Scientific | 10 | 80  | 13 | 0 | 337 | Cholangitis, SDPP                                                                              |
| 52                | 2019 | Benign stricture   | Anastomotic | 0 | 0 | 0 | 0 | Surgery impeding access to papillary region | HC Giobor / Taewoo              | 10 | 100 | 11 | 0 | 99  | Cholangitis, PP day 0                                                                          |
| 78                | 2019 | Pancreatic cancer  | Distal      | 0 | 0 | 0 | 0 | Papilla accessible but ERCP failed          | HC Giobor / Taewoo              | 8  | 100 | 9  | 0 | 21  | Cholangitis, PP day 1                                                                          |
| Stent dysfunction |      |                    |             |   |   |   |   |                                             |                                 |    |     |    |   |     |                                                                                                |
| 50                | 2016 | Pancreatic cancer  | Distal      | 1 | 1 | 1 | 0 | Surgery impeding access to papillary region | FC Wallflex / Boston Scientific | 10 | 80  | 16 | 1 | 49  | Stent obstruction PP day 42, no additional procedure                                           |
| 57                | 2017 | Cholangiocarcinoma | Hilar       | 0 | 1 | 1 | 0 | Surgery impeding access to papillary region | FC Wallflex / Boston Scientific | 10 | 80  | 7  | 0 | 866 | Stent obstruction PP day 424 solved by substitution of the SEMS using the same fistulous tract |

## Supplementary material

|    |      |                                           |                 |   |   |                                                   |   |                                                         |    |    |    |   |     |                                                                                                                                |
|----|------|-------------------------------------------|-----------------|---|---|---------------------------------------------------|---|---------------------------------------------------------|----|----|----|---|-----|--------------------------------------------------------------------------------------------------------------------------------|
| 59 | 2017 | Cholangiocarci<br>noma                    | Hilar           | 0 | 0 | Papilla accessible but<br>ERCP failed             | 0 | UC +<br>FC<br>Wallflex<br>/<br>Boston<br>Scientifi<br>c | 10 | 60 | 10 | 1 | 273 | Stent<br>obstruction<br>PP day<br>140 solved<br>by SEMS<br>in SEMS                                                             |
| 64 | 2018 | Pancreatic<br>cancer                      | Anastom<br>otic | 1 | 0 | Surgery impeding<br>access to papillary<br>region | 0 | UC +<br>FC<br>Wallflex<br>/<br>Boston<br>Scientifi<br>c | 10 | 60 | 8  | 1 | 167 | Stent<br>obstruction<br>PP day 96<br>solved by<br>new HG                                                                       |
| 61 | 2018 | Ab estrinseco<br>malignant<br>compression | Hilar           | 1 | 0 | Papilla accessible but<br>ERCP failed             | 0 | UC +<br>FC<br>Wallflex<br>/<br>Boston<br>Scientifi<br>c | 10 | 60 | 8  | 1 | 251 | Stent<br>obstruction<br>PP day 77<br>solved by<br>new HG                                                                       |
| 78 | 2018 | Cholangiocarci<br>noma                    | Hilar           | 0 | 0 | Surgery impeding<br>access to papillary<br>region | 1 | PC<br>Wallflex<br>/<br>Boston<br>Scientifi<br>c         | 10 | 80 | 13 | 0 | 337 | Cholangiti<br>s, PP day<br>0<br>+<br>Stent<br>obstruction<br>PP day<br>196 solved<br>by intra-<br>SEMS<br>plastic<br>placement |

## Supplementary material

|    |      |                  |             |   |   |                                             |   |                      |   |    |   |   |    |                                                                                 |
|----|------|------------------|-------------|---|---|---------------------------------------------|---|----------------------|---|----|---|---|----|---------------------------------------------------------------------------------|
| 75 | 2019 | Benign stricture | Anastomotic | 1 | 0 | Surgery impeding access to papillary region | 0 | HC Giobor / Taewoong | 8 | 80 | 7 | 0 | 57 | Stent obstruction PP day 43 solved by transgastric SEMS cleaning through Dormia |
|----|------|------------------|-------------|---|---|---------------------------------------------|---|----------------------|---|----|---|---|----|---------------------------------------------------------------------------------|

SEMS, self-expanding metal stent; GW, guidewire; PP, post-procedure; HG, hepatico-gastrostomy; SDPP, same day post-procedure
